# Supplementary material for: Peripheral Blood Mesenchymal Stem Cell–Derived Exosomes Improve Renal Sympathetic Denervation Efficacy Through β-Catenin-Mediated Cardiac Reprogramming
Source: Research Square preprint supplement (doi:10.21203/rs.3.rs-6409278/v1), 2025-04-10
Supplement: Supplementary file 1 [file 741c1f70f4519ac2e6fbf063.docx]

**SUPPLEMENTAL DATA**

**Figure and Table Legends**

**Figure S1 The effects of various doses of PBMSC-Exos on ischemia-induced cardiac injury.** (**A, B**) LVEF (**A**) and plasma hs-cTnT level (**B**) of MI rats treated with PBS or varying doses of PBMSC-Exos (5×1012, 2×1013, or 5×1013) 30 days following myocardial I/R injury. (**C**) mRNA expression of β-catenin and Oct4 in the hearts of rats treated with treated with PBS or varying doses of PBMSC-Exos (5×1012, 2×1013, or 5×1013) 30 days following myocardial I/R injury. Data are presented as mean ± SD. Statistical significance was determined using 1-way ANOVA followed by Tukey’s multiple comparisons test. ***P < 0.001 between two groups; ns, Non-Significant, n = 5 per group. Exos=exosoms; LVEF=left ventricular ejection fraction; PBS=phosphate buffered saline; PBMSCs= peripheral blood mesenchymal stem cells; RD=renal denervation.

**Figure S2 Overview of Study Design and Animal Inclusion Process.** Exos=exosomes; HFrEF=heart failure with reduced ejection fraction; MI=myocardial infarction; PBS=phosphate buffered saline; RD=renal sympathetic denervation.

**Figure S3 RAAS Alterations After RD and Exos Injection**

(**A** and **B**) Kidney angiotensin I (**A**) and angiotensin II (**B**) levels 90 days after MI in RD-Sham+PBS, RD-Sham+Exo, RD+PBS, and RD+Exo groups. (C-F) Plasma renin (**C**), angiotensin I (**D**), angiotensin II (**E**), and aldosterone (**F**) levels 90 days after MI. All data, presented as means ± standard deviations, were analyzed using one-way ANOVA. **P* < 0.05, **P* < 0.01, ****P* < 0.001 between groups; ns, Non-Significant, n = 5 for RD-Sham+PBS, 7 for RD-Sham+Exos, 8 for RD-Sham+PBS, and 10 for RD+Exos. Exos=exosoms; MI=myocardial infarction; PBS=phosphate buffered saline; PBMSCs= peripheral blood mesenchymal stem cells; RAAS=renin aniotension aldosterone system; RD=renal denervation.

**Figure S4 PBMSC-ExosRD Affect CMs Dedifferentiation, Proliferation, and Redifferentiation**

At 14 days after MI, CMs were collected from infarcted pigs receiving RD (RDCMs) and then cultured with PBMSC-ExosRD-Sham or PBMSC-ExosRD for 48 h under hypoxic conditions. (**A**) Divergent CMs dedifferentiation. Representative images (**Aa**) and quantification (**Ab**) of CMs (stained with MHC as green) that lost the contractile protein cTnI (red) 48 h after culture. Scale bar: 50 μm. (**B**-**E**) Representative images (**a**) and quantification (**b**) of CMs expressing dedifferentiation markers Runx1 (**Ba**, red) and Dab2 (**Ca**, red) and proliferation markers Ki67 (**Da**, red) and PH3 (**Ea**, red). Scale bar: 50 μm. (**F**) Representative images (**a**) and quantification (**b**) of the CM redifferentiation marker cTnT (red). Scale bar: 50 μm. All graphs present data as means ± standard deviations, analyzed using Student’s *t* test. ****P* < 0.001; n = 10 per group. CMs=cardiomyocytes; cTnT=cardiac troponin-T; cTnI=cardiac troponin I; DAPI=4′,6- Diamidino-2-phenylindole; Exos=exosoms; MHC=myosin heavy chain; PBMSCs= peripheral blood mesenchymal stem cells; RD=renal denervation; RDCMs=renal sympathetic denervation-treated cardiomyocytes.

**Figure S5 Reprogramming-Related Factors Altered by PBMSCs-ExosRD in CMs.** Reprogramming-associated molecular signatures in CMs were significantly modulated by PBMSC-ExosRD treatment at 14 days post-MI, as demonstrated by comparative analysis of CMs isolated via cardiac biopsy from RD-treated and RD-Sham control groups at 14 days post-MI. (**A**) Heatmaps of top DEGs according to GO classes. (**B**) Comparison of cytokine concentrations (pg/mL) in the CMs receiving PBMSCs-ExosRD or PBMSCs-ExosRD-Sham, as detected using an antibody array. All data, presented as means ± standard deviations, were analyzed using Student’s *t* test. **P* < 0.05, **P* < 0.01, ****P* < 0.001 between groups; n = 10 per group. CMs=cardiomyocytes; Exos=exosoms; MI=myocardial infarction; PBMSCs= peripheral blood mesenchymal stem cells; RD=renal denervation.

**Figure S6 Identification of the potential target of miR-141-200-429 cluster.** (**A)** The mRNA levels of *Dkk1* were determined by qRT-PCR in RDCMs transfected with miR-141-200- 429 mimics, sponges , or scrambled miRNA/NC sponges after 48 hours of hypoxic culture. (**B**) The protein levels (upper ) of Dkk1 were determined by Western blot in RDCMs transfected with miR-141-200- 429 mimics, sponges, or scrambled miRNA/NC sponges after 48 hours of hypoxic culture, and its representative images (lower). All data, presented as means ± standard deviations, were analyzed using one-way analysis of variance. ****P* < 0.001; ns, Non-Significant, n = 5, each group. NC= negative control; RDCMs=renal sympathetic denervation-treated cardiomyocytes.

**Figure S7 RD+Exos Promotes Cardiac Reprogramming by Wnt/β-Catenin Pathway Activation**

(**A**) Western blotting of β-catenin, p-GSK-3β S9, and Dkk1 expression in HFrEF hearts 90 days after MI. (**B**) Quantitative analysis of results in (**A**). (**C**) Representative immunohistochemical images of β-catenin, GSK-3β, and Dkk1. Scale bar: 50 µm. (**D** and **E**) Human pluripotent stem cell antibody arrays for detection of the relative expression of β-catenin downstream targets in HFrEF hearts after early RD-Sham or RD plus delayed injection of PBS or Exos. (**F**) Western blots for factors in (**D**) and (**E**). (**G**) Representative images of immunohistochemical staining for OCT4, KLF4, NANOG, YAP1, TCF4, GATA4, and LEF1 in HFrEF hearts 90 days after MI. Scale bar: 20 µm. All data, presented as means ± standard deviations, were analyzed using one-way ANOVA. *P* < 0.05: *vs. RD-Sham+PBS, #vs. RD-Sham+Exos, †vs. RD+PBS;n = 5 per group. Exos=exosoms; HFrEF=heart failure with reduced ejection fraction; MI=myocardial infarction; PBMSCs= peripheral blood mesenchymal stem cells; PBS=phosphate buffered saline; RD=renal denervation.

**Figure S8 Mechanism Underlying PBMSCs-ExosRD-Mediated Cardiac Repair**

PBMSC-ExosRD encapsulate a miR-141-200-429 cluster that selectively targets and modulates the β-catenin/Dkk1 signaling axis. Mechanistically, this miRNA-mediated regulation: (1) Enhances interorgan crosstalk between RD-mediated pathways and myocardial repair processes post-MI; (2) Promotes CM regeneration and proliferation via Dkk1 suppression; (3) Suppresses CM apoptosis through Wnt/β-catenin activation. Collectively, these orchestrated actions drive significant improvements in cardiac structural and functional recovery. CMs=cardiomyocytes; Exos=exosoms; PBMSCs= peripheral blood mesenchymal stem cells; RD=renal denervation. (Visual summary of this mechanism is presented in **Figure S8**, created with Figdraw [www.figdraw.com].)

**Table S1 Primers for qRT-PCR analysis of rat tissues.**

**Table S2 Antibodies for immunofluorescence (IF), immunohistochemistry (IHC), and western blotting (WB).**

**Table S3 The effects of RD on blood pressure, heart rate, cardiac function, SNS, and RAAS in sham operated animals.** All data, presented as means ± standard deviations, were analyzed using one-way analysis of variance (n=5, means±SD). Ang=angiotensin; BNP=brain natriuretic peptide; IL-6=Interleukin-6; LVEF=left ventricular ejection fraction; MABP=mean arterial blood pressure; NE= Norepinephrine; RD=renal sympathetic denervation.
